# Supplementary material for: Hypermagnesemia in critically ill patients with cancer: A case report
Source: PubMed Central journal article supplement — Mol Clin Oncol. 2021 Apr 21;14(6):123. doi: 10.3892/mco.2021.2285 (PMC8082223; doi:10.3892/mco.2021.2285), 2021-04-21
Supplement: Supplementary_Data.pdf [file Supplementary_Data.pdf]

Figure S1. Impurity test results of the batch of lactulose used.

|  <b>TUTON PHARMACEUTICALS</b><br>85, G.I.D.C. ESTATE,,RELIANCE ROAD,NARODA,AHMEDABAD-382330<br>REG.OFF.: 85, G.I.D.C. ESTATE,,RELIANCE ROAD,NARODA,AHMEDABAD-382330<br>Phone : 40082244 TO 48 Fax : 40082248<br>Email : jaimish@tutonpharma.com; pankil@tutonpharma.com<br><b>A/C OF INTAS PHARMACEUTICALS LTD</b><br><b>QUALITY CONTROL DEPARTMENT</b><br>THE DRUG & COSMETIC ACT. 1940 & THE RULES THERE UNDER FORM-39(RULE 150-E(F))<br><b>CERTIFICATE OF ANALYSIS (FINISH STAGE)</b> |                                                 |                                                                                                                                                                                                                                                                                                                                                                                                                                                                                                                                                     |                                                                                                                                    |
|---------------------------------------------------------------------------------------------------------------------------------------------------------------------------------------------------------------------------------------------------------------------------------------------------------------------------------------------------------------------------------------------------------------------------------------------------------------------------------------------------------------------------------------------------------------------------|-------------------------------------------------|-----------------------------------------------------------------------------------------------------------------------------------------------------------------------------------------------------------------------------------------------------------------------------------------------------------------------------------------------------------------------------------------------------------------------------------------------------------------------------------------------------------------------------------------------------|------------------------------------------------------------------------------------------------------------------------------------|
| <b>Product Name</b> : LOOZ<br><b>Generic Name</b> : LACTULOSE SOLUTION U.S.P.<br><b>Product Code</b> : 37LL03U                                                                                                                                                                                                                                                                                                                                                                                                                                                            |                                                 | <b>Batch No.</b> : LY55161 <b>Batch Size</b> : 2000 LTR                                                                                                                                                                                                                                                                                                                                                                                                                                                                                             |                                                                                                                                    |
| <b>Label Claim</b><br>Each 15 ml contain:<br>Lactulose concentrate U.S.P.<br>eq. to Lactulose..... 10 gm<br>Aqueous flavoured..... q.s.<br>Colour: Caramel                                                                                                                                                                                                                                                                                                                                                                                                                |                                                 | <b>Location</b> : NARODA<br><b>Make</b> : INTAS<br><b>Mfg. Lic No.</b> : G/1177-A<br><b>Specification No.</b> : 1617FPSL03U<br><b>Specification Dt.</b> : 15-07-2016<br><br><b>Test As Per</b> : USP<br><b>Test Packing</b> : 1X202ML<br><b>Sample Size</b> : 202.000 ML<br><b>Mfg. Dt.</b> : JUL-2019 <b>Exp. Dt.</b> : JUN-2021<br><b>T.R. Slip No.</b> : NIFFT19712<br><b>T.R. Slip Dt.</b> : 22-07-2019<br><b>Analysis Date</b> : 29-07-2019<br><b>A.R. No.</b> : F719200178<br><b>A.R. Dt.</b> : 29-07-2019<br><b>Released Qty.</b> : 2000 LTR |                                                                                                                                    |
| Sr                                                                                                                                                                                                                                                                                                                                                                                                                                                                                                                                                                        | Test                                            | Result                                                                                                                                                                                                                                                                                                                                                                                                                                                                                                                                              | Specification                                                                                                                      |
| 1                                                                                                                                                                                                                                                                                                                                                                                                                                                                                                                                                                         | DESCRIPTION                                     | Amber coloured viscous liquid with sweet flavour in amber coloured PVC bottles.                                                                                                                                                                                                                                                                                                                                                                                                                                                                     | Amber coloured viscous liquid with sweet flavour in amber coloured PVC bottles.                                                    |
| 2                                                                                                                                                                                                                                                                                                                                                                                                                                                                                                                                                                         | IDENTIFICATION A                                | Complies.                                                                                                                                                                                                                                                                                                                                                                                                                                                                                                                                           | The retention time of the major peak in the chromatogram of the assay preparation corresponds to that of the standard preparation. |
| 3                                                                                                                                                                                                                                                                                                                                                                                                                                                                                                                                                                         | IDENTIFICATION B                                | Complies.                                                                                                                                                                                                                                                                                                                                                                                                                                                                                                                                           | Red precipitate of cuprous oxide should be formed.                                                                                 |
| 4                                                                                                                                                                                                                                                                                                                                                                                                                                                                                                                                                                         | IMPURITY                                        | Organic impurities:- Complies.<br>Fructose : Not detected<br>Galactose: 10.5128 %<br>Epilactose: 3.7334 %<br>lactose: 7.2858 %<br>Tagatose : 0.6759 %                                                                                                                                                                                                                                                                                                                                                                                               | Organic impurities:-<br>Fructose : NMT 1 %<br>Galactose:NMT 16 %<br>Epilactose: NMT 8 %<br>lactose: NMT 12 %<br>Tagatose : NMT 3 % |
| 5                                                                                                                                                                                                                                                                                                                                                                                                                                                                                                                                                                         | SPECIFIC TESTS                                  | Microbial Enumeration tests :-<br>Total Bacterial Counts: 30 cfu/gm of Lactulose.                                                                                                                                                                                                                                                                                                                                                                                                                                                                   | Microbial Enumeration tests :-<br>Total Bacterial Counts: NMT 100 cfu/gm of Lactulose.                                             |
| 6                                                                                                                                                                                                                                                                                                                                                                                                                                                                                                                                                                         | TESTS FOR SPECIFIED MICROORGANISMS              | Escherichia coli : Escherichia coli is absent.<br>Salmonella species: Salmonella is absent.                                                                                                                                                                                                                                                                                                                                                                                                                                                         | Escherichia coli : Escherichia coli should be absent.<br>Salmonella species: Salmonella should be absent.                          |
| 7                                                                                                                                                                                                                                                                                                                                                                                                                                                                                                                                                                         | PH                                              | 4.26 pH                                                                                                                                                                                                                                                                                                                                                                                                                                                                                                                                             | 2.5 to 6.5 pH                                                                                                                      |
| 8                                                                                                                                                                                                                                                                                                                                                                                                                                                                                                                                                                         | ASSAY OF LACTULOSE CONCENTRATE EQ. TO LACTULOSE | 98.67 % of the Label Claim.                                                                                                                                                                                                                                                                                                                                                                                                                                                                                                                         | 90.0 % to 110.0 % of the LA.                                                                                                       |
| <b>Conclusion</b> : The above sample complies as per USP<br>In the Opinion of the undersigned the sample referred to above is of Standard quality as defined in the Act and the Rules made thereunder for the result given above. "This computer generated certificate of analysis is valid without signature"                                                                                                                                                                                                                                                            |                                                 |                                                                                                                                                                                                                                                                                                                                                                                                                                                                                                                                                     |                                                                                                                                    |
| Analysis By<br><br>DHARTI R PATEL<br>Q.C. OFFICER                                                                                                                                                                                                                                                                                                                                                                                                                                      |                                                 | Checked By<br><br>MITTAL H PATEL<br>Q.C. OFFICER                                                                                                                                                                                                                                                                                                                                                                                                                 |                                                                                                                                    |
|                                                                                                                                                                                                                                                                                                                                                                                                                                                                                                                                                                           |                                                 | Approved By<br><br>YOGESH J. PATEL<br>MANAGER - QA & QC                                                                                                                                                                                                                                                                                                                                                                                                        |                                                                                                                                    |
